# Supplementary material
Source: PubMed Central journal article supplement (PMC7960574)
Supplement: NIHMS1632153-supplement-1.pdf [file NIHMS1632153-supplement-1.pdf]

## Supporting Information

### Review of Integrin-targeting Biomaterials in Tissue Engineering

Prachi S. Dhavalikar, Andrew J. Robinson, Ziyang Lan, Dana Jenkins, Malgorzata Chwatko, Karim Salhadar, Anupriya Jose, Ronit Kar, Erik Y. Shoga, Aparajith Kannapiran, and Elizabeth Cosgriff-Hernandez\*

**Supplemental Table 1:** Key integrins, ligands, and functions in osteogenic differentiation and bone remodeling.

| Integrin          | Ligand (Proteins and Peptides)                                                                                                                                                        | Cellular Function *                                                                                                                                                                                                                                                                                                                                                                                                    |
|-------------------|---------------------------------------------------------------------------------------------------------------------------------------------------------------------------------------|------------------------------------------------------------------------------------------------------------------------------------------------------------------------------------------------------------------------------------------------------------------------------------------------------------------------------------------------------------------------------------------------------------------------|
| $\alpha 1\beta 1$ | Collagen I <sup>[11, 353]</sup> , Scl2 <sub>GFPGER</sub> <sup>[74]</sup> , Scl2 <sub>GFPGEN</sub> <sup>[74]</sup>                                                                     | -Facilitates adhesion of hMSCs <i>in vitro</i> <sup>[11]</sup><br>-Increased hMSC osteogenic differentiation (osteogenic medium) <sup>[74]</sup><br>-Promoted cartilage production in mouse model <sup>[353]</sup>                                                                                                                                                                                                     |
| $\alpha 2\beta 1$ | Collagen I <sup>[11]</sup> , GFOGER <sup>**</sup> <sup>[73]</sup> , P15 <sup>[354]</sup> , DGEA <sup>[355]</sup> , FNIII9-10 <sup>[25]</sup> , Scl2 <sub>GFPGER</sub> <sup>[74]</sup> | -Facilitates adhesion and survival of hMSCs, rOC <i>in vitro</i> <sup>[11, 89]</sup> and hMSCs in mouse models <sup>[66]</sup><br>-Activated focal adhesion kinase, osteoblast-specific promoters, and induced osteogenic differentiation (ALP and mineralization) in mPOB and hMSCs (osteogenic medium) <sup>[69, 71, 73, 74, 354-356]</sup><br>-Promoted bone formation in murine bone defect model <sup>[357]</sup> |
| $\alpha 3\beta 1$ | Collagen <sup>[14]</sup> , Fibronectin <sup>[14, 16]</sup>                                                                                                                            | -Increased cell expression under conditions favoring osteoblastic phenotype <sup>[55]</sup><br>-rOBs showed decreased mineralization during nodule morphogenesis (w/ function-perturbing antibodies) <sup>[14]</sup><br>-Expressed on OBs actively synthesizing bone <sup>[55, 358]</sup>                                                                                                                              |
| $\alpha 4\beta 1$ | Fibronectin <sup>[18, 19]</sup>                                                                                                                                                       | -Increased homing and rolling of mMSCs to the bone marrow <sup>[60, 61]</sup><br>-Mediates initial attachment of MSCs to bone marrow or basement membrane (human and mouse) <sup>[61, 63]</sup>                                                                                                                                                                                                                        |
| $\alpha 5\beta 1$ | Fibronectin <sup>[25]</sup> , cRRETAWA <sup>[294]</sup> , GACRETAWACGA <sup>[359]</sup> , FNIII7-10 <sup>[360]</sup>                                                                  | -Facilitates hMSC migration <sup>[62]</sup><br>-Increased proliferation in osteoblasts (rat and mouse) <sup>[14, 81]</sup>                                                                                                                                                                                                                                                                                             |

|                    |                                                                                                                                          |                                                                                                                                                                                                                                                                                                                                                                                                                                                     |
|--------------------|------------------------------------------------------------------------------------------------------------------------------------------|-----------------------------------------------------------------------------------------------------------------------------------------------------------------------------------------------------------------------------------------------------------------------------------------------------------------------------------------------------------------------------------------------------------------------------------------------------|
|                    |                                                                                                                                          | <ul style="list-style-type: none"> <li>-Promotes osteogenic differentiation mMSC and hMSC (growth/osteogenic media) <sup>[25, 50, 51, 75-77, 294, 359-361]</sup></li> <li>-Plays a role in mechanosensitive osteogenic differentiation in hMSCs in vitro <sup>[76, 77]</sup></li> <li>-Regulates mechanotransduction in osteoblasts <sup>[82]</sup></li> <li>-Promotes mineralization in osteoblasts (rat and mouse) <sup>[14, 71]</sup></li> </ul> |
| $\alpha 9\beta 1$  | ADAM8 (autocrine factor) <sup>[33]</sup> , Osteopontin <sup>[32]</sup>                                                                   | <ul style="list-style-type: none"> <li>-Increases mobility of osteoclasts (human and rat) <sup>[33]</sup></li> <li>-Regulator of osteoclastogenesis (increased bone volume in rats with double knockdown for integrin) <sup>[32, 33]</sup></li> </ul>                                                                                                                                                                                               |
| $\alpha 11\beta 1$ | Osteolectin (growth factor) <sup>[35]</sup> , Collagen I <sup>[11]</sup>                                                                 | <ul style="list-style-type: none"> <li>-Promotes hMSCs survival (integrin knockdown had high levels of apoptosis) <sup>[11]</sup></li> <li>-Promotes differentiation of osteoprogenitors to OBs (human and mouse) <sup>[35]</sup></li> </ul>                                                                                                                                                                                                        |
| $\alpha v\beta 3$  | Vitronectin <sup>[38]</sup> , Fibronectin <sup>[25]</sup> , Bone Sialoprotein <sup>[39]</sup> , RGD (cyclic and linear) <sup>[362]</sup> | <ul style="list-style-type: none"> <li>-Increases mOC migration <sup>[85]</sup></li> <li>-Inhibits proliferation and differentiation of hMSCs <sup>[25, 50]</sup></li> <li>-Plays a role in mechanosensitive osteogenic differentiation in hMSCs in vitro <sup>[76, 77]</sup></li> <li>-Involved in both phases of bone remodeling, formation and resorption <sup>[38, 85, 362, 363]</sup></li> </ul>                                               |

<sup>a)</sup> \*Mesenchymal stem cell (MSC), osteoblast (OB), preosteoblasts (POB), osteoclast (OC), h- (human), r- (rat), and m- (murine); <sup>b)</sup> \*\* Synthetic collagen-mimetic motif that resides in sequence GPOGCO(GPO)<sub>2</sub>GFOGER(GPO)<sub>5</sub>

**Supplementary Table 2:** Key integrins, ligands, and mediated cellular functions in wound healing.

| Integrin          | Ligands                                                                                                                              | Cellular functions                                                                                                                                                                                                                                                                                                                                    |
|-------------------|--------------------------------------------------------------------------------------------------------------------------------------|-------------------------------------------------------------------------------------------------------------------------------------------------------------------------------------------------------------------------------------------------------------------------------------------------------------------------------------------------------|
| $\alpha 1\beta 1$ | Collagen I, IV                                                                                                                       | <ul style="list-style-type: none"> <li>-Upregulates dermal fibroblast proliferation <sup>[9]</sup></li> <li>-Downregulates collagen synthesis and increase collagenase synthesis during ECM deposition <sup>[134]</sup></li> <li>-Promotes collagen gel contraction by fibroblast <sup>[146, 147]</sup></li> </ul>                                    |
| $\alpha 2\beta 1$ | Collagen I, GFOGER* <sup>[364]</sup> , Scl2 <sub>GFPGER</sub> <sup>[129]</sup> , EF1(DYATLQLQEGRLLHFMFDLG, Laminin) <sup>[130]</sup> | <ul style="list-style-type: none"> <li>-Induces the MMP-1 production and promotes keratinocyte migration <sup>[105]</sup></li> <li>-Promotes keratinocyte proliferation <sup>[117]</sup></li> <li>-Mediates fibroblast proliferation <sup>[128-130]</sup></li> <li>-Promotes the gel collagen matrix contraction <sup>[37, 148, 365]</sup></li> </ul> |

|                      |                                                                                                                  |                                                                                                                                                                                                                                                                                                                                                                                                                   |
|----------------------|------------------------------------------------------------------------------------------------------------------|-------------------------------------------------------------------------------------------------------------------------------------------------------------------------------------------------------------------------------------------------------------------------------------------------------------------------------------------------------------------------------------------------------------------|
| $\alpha 3\beta 1$    | Laminin 332, entactin <sup>[13]</sup>                                                                            | -Regulates keratinocyte polarization and processive migration <sup>[107] [17]</sup><br>-Induce basement membrane formation <sup>[366]</sup><br>-Enhances the deposition of entactin and fibronectin <sup>[13]</sup>                                                                                                                                                                                               |
| $\alpha 4\beta 1$    | EDA-fibronectin, ELIMIN1 <sup>[20]</sup>                                                                         | -Downregulates fibroblast and keratinocyte proliferation <sup>[20]</sup><br>-Mediates fiber assembly and fibronectin synthesis by fibroblast <sup>[138]</sup><br>-Enhances the fibronectin-matrix contraction by interacting with region V of fibronectin <sup>[143]</sup>                                                                                                                                        |
| $\alpha 5\beta 1$    | Fibronectin, Gelatin <sup>[22-24]</sup>                                                                          | -Enhances keratinocyte proliferation <sup>[115, 367]</sup><br>-Enhances fibroblast migration into blood clot <sup>[132]</sup><br>-Improves fibroblast proliferation <sup>[22-24]</sup><br>-Promotes fibronectin fibril deposition <sup>[136, 137, 368]</sup><br>-Mediates TGF- $\beta$ 1-induced myofibroblast differentiation <sup>[140]</sup><br>-Promotes fibronectin matrix contraction <sup>[141, 142]</sup> |
| $\alpha 6\beta 1$    | Laminin 111, CCN2 <sup>[27]</sup> , YIGSR(Laminin) <sup>[28]</sup>                                               | -Mediates keratinocyte proliferation <sup>[28]</sup><br>-Regulates basement membrane formation and laminin synthesis <sup>[135]</sup><br>-Stimulates collagen synthesis <sup>[27]</sup>                                                                                                                                                                                                                           |
| $\alpha 9\beta 1$    | Fibronectin <sup>[30]</sup> , tenascin-C <sup>[31]</sup> , ELIMIN1 <sup>[20]</sup>                               | -Mediates keratinocyte and fibroblast proliferation <sup>[20, 30]</sup><br>-Regulates dermal fibroblasts migration <sup>[31]</sup>                                                                                                                                                                                                                                                                                |
| $\alpha 11\beta 1$   | Collagen I                                                                                                       | -Regulates fibroblast migration <sup>[133]</sup><br>-Mediates myofibroblast differentiation <sup>[133]</sup><br>-Participates in collagen remodeling <sup>[133]</sup>                                                                                                                                                                                                                                             |
| $\alpha 6\beta 4$    | Laminin 332                                                                                                      | -Promote keratinocyte migration <sup>[109]</sup><br>-Constitutes hemidesmosomes as an essential component <sup>[111]</sup>                                                                                                                                                                                                                                                                                        |
| $\alpha \nu \beta 3$ | Gelatin <sup>[22-24]</sup> , Fibrinogen <sup>[37]</sup> , tenascin-C <sup>[139]</sup> , CCN1 <sup>[40, 43]</sup> | -Improves fibroblast proliferation <sup>[22-24, 40]</sup><br>-Induces MMP expression and collagen degradation <sup>[43]</sup><br>-Modulates the deposition of tenascin-C <sup>[139]</sup><br>-Mediates collagen gel contraction <sup>[37]</sup>                                                                                                                                                                   |
| $\alpha \nu \beta 5$ | CCN1                                                                                                             | -Enhances fibroblast migration <sup>[40]</sup>                                                                                                                                                                                                                                                                                                                                                                    |

<sup>a)</sup> \* Synthetic collagen-mimetic motif that resides in sequence  
GPOGCO(GPO)<sub>2</sub>GFOGER(GPO)<sub>5</sub><sup>[364]</sup>

**Supplementary Table 3: Key integrins, ligands, and functions in angiogenesis.**

| <b>Integrin</b>   | <b>Ligand</b>                                                                                                                          | <b>Function</b>                                                                                                                                                                                                                                                                                                                                                    |
|-------------------|----------------------------------------------------------------------------------------------------------------------------------------|--------------------------------------------------------------------------------------------------------------------------------------------------------------------------------------------------------------------------------------------------------------------------------------------------------------------------------------------------------------------|
| $\alpha 1\beta 1$ | Collagen <sup>[8, 10]</sup> , Laminin <sup>[10]</sup> ,                                                                                | -Inhibits production of MMP 7 and 9 that produce angiostatin thus preventing reduced endothelial proliferation <sup>[195]</sup><br>-Support proliferation and migration of endothelial cells during VEGF induced angiogenesis <sup>[160, 181, 369]</sup>                                                                                                           |
| $\alpha 2\beta 1$ | Collagen <sup>[10]</sup> , Laminin <sup>[10]</sup> ,                                                                                   | -Support proliferation and migration of endothelial cells during VEGF induced angiogenesis <sup>[160, 181, 369]</sup><br>-Involved in morphogenesis and tube formation <sup>[166, 256, 370]</sup>                                                                                                                                                                  |
| $\alpha 3\beta 1$ | laminin <sup>[10]</sup> , collagen <sup>[10]</sup> , fibronectin <sup>[15]</sup> , Fn9*10 sequence containing RGD <sup>[203]</sup>     | -Organized and non-leaky networks <sup>[203]</sup><br>-Represses pathological angiogenesis <sup>[204]</sup><br>-Promotes endothelial cell motility and multicellular network formation <sup>[371]</sup>                                                                                                                                                            |
| $\alpha 4\beta 1$ | Fibronectin <sup>[15]</sup> , VCAM <sup>[21]</sup> , REDV <sup>[197, 198]</sup>                                                        | -Mediates endothelial cell-pericyte interaction for the survival of both cell types <sup>[21]</sup>                                                                                                                                                                                                                                                                |
| $\alpha 5\beta 1$ | Fibronectin and Fibrin <sup>[10]</sup> , PHSRN <sup>[200, 372]</sup> , Fn9*10 sequence containing RGD <sup>[203]</sup>                 | - organized and non-leaky vascular networks <sup>[203]</sup><br>-Regulates tube diameter and the formation of multicellular networks <sup>[42, 202]</sup>                                                                                                                                                                                                          |
| $\alpha 6\beta 1$ | Laminin <sup>[26]</sup><br>IKVAV <sup>[216, 217, 373]</sup>                                                                            | -Supports migration of endothelial cells during VEGF induced angiogenesis <sup>[168]</sup><br>- capillary morphogenesis and tube formation <sup>[168, 214]</sup>                                                                                                                                                                                                   |
| $\alpha 6\beta 4$ | Laminin <sup>[26]</sup>                                                                                                                | -Downregulated during initial phases of angiogenesis to promote migration <sup>[180]</sup><br>-Adhesion of endothelial cells to the basement membrane promoting vessel integrity, maturation, and function <sup>[158, 180]</sup>                                                                                                                                   |
| $\alpha 9\beta 1$ | VEGF-A <sup>[34]</sup>                                                                                                                 | -Directly binds VEGF-A promoting angiogenesis <sup>[34]</sup>                                                                                                                                                                                                                                                                                                      |
| $\alpha V\beta 3$ | Vitronectin, fibronectin, fibrinogen, denatured collagen I and IV <sup>[10, 15, 374]</sup> , Fn9(4G)10 containing RGD <sup>[203]</sup> | -Disorganized, dense and leaky vascular networks <sup>[203]</sup><br>-Aids in VEGFR2 phosphorylation during VEGF induced angiogenesis <sup>[159]</sup><br>-Promotes endothelial cell proliferation <sup>[210]</sup><br>-Substrate dependent vacuole and lumen formation <sup>[173]</sup><br>-Mediates MMP-2 localization of the cell surface <sup>[188, 207]</sup> |
| $\alpha V\beta 5$ | Vitronectin, fibronectin <sup>[15, 26]</sup> ,                                                                                         | -VEGF mediated angiogenesis <sup>[206]</sup><br>-Substrate dependent vacuole and lumen formation <sup>[173]</sup>                                                                                                                                                                                                                                                  |
